# Supplementary material
Source: publisher figshare collection journal article supplement (https://sage.figshare.com/ndownloader/files/14802146)
Supplement: Supplementary file 1 [file 14802146]

## APPENDIX A

### APPENDIX A

| level    | Complication list                                                                               | Consensus | Round |
|----------|-------------------------------------------------------------------------------------------------|-----------|-------|
| mild     | Allergic reaction requiring treatment to be aborted and medication to be started                | Major     | 3     |
| moderate | Allergic reaction requiring treatment to be aborted and ventilator support                      | Major     | 1     |
| mild     | Cellulitis requiring oral antibiotics                                                           | None      | -     |
| moderate | Cellulitis requiring hospital admission for treatment with IV antibiotics                       | Major     | 1     |
| severe   | Cellulitis causing sepsis requiring IV antibiotics & ICU support due to hemodynamic instability | Major     | 1     |
| moderate | Deep venous thrombosis requiring long-term anticoagulant therapy                                | Major     | 2     |
| severe   | Deep venous thrombosis requiring lytic therapy                                                  | Major     | 2     |
| mild     | Superficial wound infection requiring oral antibiotics                                          | None      | -     |
| moderate | Superficial wound infection requiring opening of the wound at bedside                           | None      | -     |
| severe   | Deep wound infection requiring surgical debridement                                             | Major     | 1     |
| mild     | Discoloration that resolves after 6 weeks                                                       | Minor     | 1     |
| severe   | Permanent discoloration                                                                         | Major     | 4     |
| mild     | Ecchymosis that limits the patient to wearing post-treatment compression stockings              | Minor     | 1     |
| mild     | Erythema self-limiting after 2 weeks                                                            | Minor     | 1     |
| severe   | Erythema still present after 2 weeks                                                            | None      | -     |
| mild     | Hemorrhage requiring 1 blood transfusion                                                        | Major     | 2     |
| moderate | Hemorrhage requiring blood transfusion and limited surgical or endovascular interventions       | Major     | 1     |
| severe   | Hemorrhage requiring both massive transfusion and extensive surgical intervention               | Major     | 1     |
| mild     | Hyperpigmentation resolved within 12 months                                                     | Minor     | 5     |
| severe   | Hyperpigmentation still present after 12 months                                                 | None      | -     |
| mild     | Lymphocele or lymphorrhea resolution without aspiration                                         | None      | -     |
| moderate | Lymphocele requiring drainage or lymphorrhea                                                    | Major     | 2     |
| severe   | Lymphocele or lymphorrhea with permanent debilitating edema or continuous lymphorrhea           | Major     | 2     |
| mild     | Migraine <u>including migraine aura</u> , requiring triptan therapy after sclerotherapy         | Minor     | 2     |
| mild     | Paresthesia resolved within 12 months                                                           | Minor     | 5     |
| severe   | Paresthesia remaining present after 12 months                                                   | None      | -     |
| mild     | Post-treatment pain requiring no additional treatment                                           | Minor     | 5     |
| moderate | Post-treatment pain requiring analgesics for 2 weeks                                            | None      | -     |
| mild     | Post-treatment pruritus causing skin rash due to scratching                                     | Minor     | 1     |
| moderate | Pulmonary embolism requiring anticoagulant therapy                                              | Major     | 1     |
| severe   | Pulmonary embolism requiring surgical therapy due to hemodynamic instability                    | Major     | 1     |
| mild     | First-degree thermal injury requiring no additional treatment                                   | Major     | 4     |
| moderate | Second-degree thermal injury requiring a topical agent                                          | Major     | 2     |
| severe   | Third-degree thermal injury requiring surgical intervention                                     | (Major)   | 2     |
| mild     | Skin necrosis requiring no additional intervention                                              | None      | -     |
| moderate | Skin necrosis requiring surgical debridement                                                    | Major     | 1     |
| severe   | Skin necrosis requiring split skin graft                                                        | (Major)   | 1     |
| mild     | Superficial thrombophlebitis requiring no additional therapy                                    | (Minor)   | 1     |
| moderate | Superficial thrombophlebitis requiring analgesics for 2 weeks                                   | Minor     | 1     |
| mild     | Telangiectatic matting requiring no additional therapy                                          | (Minor)   | 1     |
| severe   | Telangiectatic matting requiring additional sclerotherapy or endovenous therapy                 | Minor     | 1     |
| mild     | Contact allergy for plaster requiring use of a different plaster                                | Minor     | 2     |
| mild     | Arteriovenous fistula requiring no additional intervention                                      | None      | -     |
| moderate | Arteriovenous fistula requiring endovascular repair                                             | Major     | 2     |
| severe   | Arteriovenous fistula requiring surgical repair                                                 | (Major)   | 2     |
| mild     | Transient ischemic attack resolved within 24 hours                                              | Major     | 3     |
| moderate | Stroke resulting in mild or temporary cognitive function impairment                             | Major     | 2     |
| severe   | Stroke with permanent disability and inability to live independently                            | (Major)   | 2     |
| mild     | Incomplete obliteration asymptomatic requiring no additional intervention                       | (Minor)   | 2     |
| severe   | Incomplete obliteration requiring re-intervention                                               | Minor     | 2     |

Second column: complications divided into levels of severity. Third column: Minor = consensus is reached that this is a minor complication, Major = consensus is reached that this is a major complication. Fourth column: 1 to 5 = number of rounds in which consensus was reached, - = no consensus was reached.
